# Supplementary material for: The Use of Proton Pump Inhibitors and COVID-19: A Systematic Review and Meta-Analysis
Source: MDPI journal article supplement (doi:10.3390/tropicalmed7030037), 2022-02-28
Supplement: s1 [file s1]

## SUPPLEMENTARY MATERIAL

**Table S1.** Search strategy used in each database searched

| Database<br>(Articles<br>Retrieved) | Search Strategy                                                                                                                                                                                                                                                                                                                                                                                                                                                                                                                                                                                                                                                                                                                                                                                                                                                                                                                                                                                                                                                                                                                                                                                                                                                                                                                                                                                                                                                                                                                                                                                                                                                                                                                                                                                                                                                                                                                                                                                                                                                                                                                                                                                                                                                                                                                                                                                                                                                                                                                                                                                                                                                                                                                                                                                                                                                                                                                                                                                                                                                                                                                                                                                                                                                                                                                                                                                                                                        |
|-------------------------------------|--------------------------------------------------------------------------------------------------------------------------------------------------------------------------------------------------------------------------------------------------------------------------------------------------------------------------------------------------------------------------------------------------------------------------------------------------------------------------------------------------------------------------------------------------------------------------------------------------------------------------------------------------------------------------------------------------------------------------------------------------------------------------------------------------------------------------------------------------------------------------------------------------------------------------------------------------------------------------------------------------------------------------------------------------------------------------------------------------------------------------------------------------------------------------------------------------------------------------------------------------------------------------------------------------------------------------------------------------------------------------------------------------------------------------------------------------------------------------------------------------------------------------------------------------------------------------------------------------------------------------------------------------------------------------------------------------------------------------------------------------------------------------------------------------------------------------------------------------------------------------------------------------------------------------------------------------------------------------------------------------------------------------------------------------------------------------------------------------------------------------------------------------------------------------------------------------------------------------------------------------------------------------------------------------------------------------------------------------------------------------------------------------------------------------------------------------------------------------------------------------------------------------------------------------------------------------------------------------------------------------------------------------------------------------------------------------------------------------------------------------------------------------------------------------------------------------------------------------------------------------------------------------------------------------------------------------------------------------------------------------------------------------------------------------------------------------------------------------------------------------------------------------------------------------------------------------------------------------------------------------------------------------------------------------------------------------------------------------------------------------------------------------------------------------------------------------------|
| Pubmed<br>(98 articles)             | <p>("sars cov 2"[MeSH Terms] OR "sars cov 2"[All Fields] OR "sars cov 2"[All Fields] OR ("sars cov 2"[MeSH Terms] OR "sars cov 2"[All Fields] OR "covid"[All Fields] OR "covid 19"[MeSH Terms] OR "covid 19"[All Fields]) OR ("coronavirus"[MeSH Terms] OR "coronavirus"[All Fields] OR "coronaviruses"[All Fields]) OR ("covid 19"[All Fields] OR "covid 19"[MeSH Terms] OR "covid 19 vaccines"[All Fields] OR "covid 19 vaccines"[MeSH Terms] OR "covid 19 serotherapy"[All Fields] OR "covid 19 serotherapy"[Supplementary Concept] OR "covid 19 nucleic acid testing"[All Fields] OR "covid 19 nucleic acid testing"[MeSH Terms] OR "covid 19 serological testing"[All Fields] OR "covid 19 serological testing"[MeSH Terms] OR "covid 19 testing"[All Fields] OR "covid 19 testing"[MeSH Terms] OR "sars cov 2"[All Fields] OR "sars cov 2"[MeSH Terms] OR "severe acute respiratory syndrome coronavirus 2"[All Fields] OR "ncov"[All Fields] OR "2019 ncov"[All Fields] OR ((("coronavirus"[MeSH Terms] OR "coronavirus"[All Fields] OR "cov"[All Fields]) AND 2019/11/01:3000/12/31[Date - Publication])) OR ("sars cov 2"[MeSH Terms] OR "sars cov 2"[All Fields] OR "ncov"[All Fields]) OR "Novel Coronavirus"[All Fields]) AND ((("Proton Pump Inhibitors"[All Fields] OR "PPI"[All Fields] OR ("reflux"[All Fields] OR "refluxant"[All Fields] OR "refluxate"[All Fields] OR "refluxates"[All Fields] OR "refluxed"[All Fields] OR "refluxers"[All Fields] OR "refluxes"[All Fields] OR "refluxing"[All Fields] OR "refluxive"[All Fields]) AND ("medic"[All Fields] OR "medical"[All Fields] OR "medicalization"[MeSH Terms] OR "medicalization"[All Fields] OR "medicalizations"[All Fields] OR "medicalize"[All Fields] OR "medicalized"[All Fields] OR "medicalizes"[All Fields] OR "medicalizing"[All Fields] OR "medically"[All Fields] OR "medicals"[All Fields] OR "medicated"[All Fields] OR "medication s"[All Fields] OR "medics"[All Fields] OR "pharmaceutical preparations"[MeSH Terms] OR ("pharmaceutical"[All Fields] AND "preparations"[All Fields]) OR "pharmaceutical preparations"[All Fields] OR "medication"[All Fields] OR "medications"[All Fields])) AND ("mortality"[MeSH Terms] OR "mortality"[All Fields] OR "mortalities"[All Fields] OR "mortality"[MeSH Subheading] OR ("hospital mortality"[MeSH Terms] OR ("hospital"[All Fields] AND "mortality"[All Fields]) OR "hospital mortality"[All Fields]) OR "sever*" [All Fields] OR "Patient Acuity"[All Fields] OR "Severity of Illness Index"[All Fields] OR ("Intensive Care Units"[MeSH Terms] OR ("intensive"[All Fields] AND "Care"[All Fields] AND "units"[All Fields]) OR "Intensive Care Units"[All Fields] OR "icu"[All Fields]) OR "Intensive Care Units"[All Fields] OR ("ventilators, mechanical"[MeSH Terms] OR ("ventilators"[All Fields] AND "mechanical"[All Fields]) OR "mechanical ventilators"[All Fields] OR ("mechanical"[All Fields] AND "ventilator"[All Fields]) OR "mechanical ventilator"[All Fields]) OR ((("medicine"[MeSH Terms] OR "medicine"[All Fields] OR "specialty"[All Fields] OR "special"[All Fields] OR "specialisations"[All Fields] OR "specialise"[All Fields] OR "specialised"[All Fields] OR "specialises"[All Fields] OR "specialising"[All Fields] OR "specialisms"[All Fields] OR "specialities"[All Fields] OR "speciality"[All Fields] OR "specialization"[MeSH Terms] OR "specialization"[All Fields]</p> |

OR  
"specialisation"[All Fields] OR "specialism"[All Fields] OR "specializations"[All Fields] OR "specialize"[All Fields] OR "specialized"[All Fields] OR  
"specializes"[All Fields] OR

---

---

"specializing"[AllFields]OR "specially"[AllFields]OR "specials"[AllFields]OR "specialties"[AllFields]OR "specialty s"[AllFields]) AND "Care"[AllFields])OR("epidemiology"[MeSHSubheading]OR "epidemiology"[AllFields]OR "morbidity"[AllFields]OR "morbidity"[MeSH Terms] OR "morbid"[All Fields] OR "morbidity"[All Fields] OR "morbidity"[All Fields] OR "morbidity"[All Fields])

CINAHL  
(33 articles)

((SARS-CoV-2) OR (COVID) OR (Coronavirus) OR (COVID-19) or (nCov) OR (“Novel Coronavirus”)) AND ((“Proton Pump Inhibitors”) OR (PPI) OR (Reflux Medications) AND ((Mortality) OR (Hospital Mortality) OR (Sever\*) OR (“Patient Acuity”) OR (“Severity of Illness Index”) OR (ICU) OR (“Intensive Care Units”) OR (Mechanical Ventilator) OR (Special Care) OR (Morbidity))

Science  
Direct (156  
articles)

SARS-CoV-2 or COVID-19 or nCov or AND “Proton Pump Inhibitors” or PPI AND Mortality OR Hospital Mortality OR Severity

---

**Table S2. Quality assessment of included observational studies using Newcastle-Ottawa Scale**

[illegible]
